1 **Risk factors associated with Parkinson's disease: An 11-year population-based South**  
2 **Korean study**

3

4 Hyoung Seop Kim, MD<sup>1</sup>, Hong-Jae Lee, MD<sup>2</sup>, Jiok Cha, PhD<sup>3</sup>, Junbeom Kwon, MD<sup>4</sup>,  
5 Hyunsun Lim, PhD<sup>5</sup>

6

7 <sup>1</sup>Department of Physical Medicine and Rehabilitation, National Health Insurance Service  
8 Ilsan Hospital, Goyang, Korea

9 <sup>2</sup>Department of Physical Medicine and Rehabilitation, Ilsanpaik Hospital, Inje University,  
10 Republic of Korea

11 <sup>3</sup>Department of Psychiatry, Columbia University Medical Center, New York, NY, USA

12 <sup>4</sup>Department of Rehabilitation Medicine and Research Institute of Rehabilitation Medicine,  
13 Yonsei University College of Medicine & Severance Hospital, Seoul, Korea.

14 <sup>5</sup>Research and Analysis Team, National Health Insurance Service Ilsan Hospital, Goyang,  
15 Korea

16

17 *Corresponding author:* Hyoung Seop Kim

18 Department of Physical Medicine and Rehabilitation, National Health Insurance Ilsan  
19 Hospital, 100 Ilsan-roilsan-donggu, Goyang 10444, Korea

20 Tel: +82-31-900-0137

21 Fax: +82-31-900-0343

22 E-mail address: rehappydoc@gmail.com

23

24 *Number of words: Main text 2708 Abstract 208*

25 *Number of references: 39*

26 ***Number of tables 3 figures 1***

27 ***Study funding:***

28 ***Disclosure of Conflicts of Interest:*** Level 0 (no funding)

29

30 ***Author Contributions:*** Dr. Hyoung Seop Kim had full access to all the data in the study and  
31 take responsibility for the integrity of the data and the accuracy of the data analysis. Dr. Jong  
32 Moon Kim, Junbeom Kwon and Jiok Cha performed data analysis and interpretation. Hyun  
33 Sun Lim performed statistical analysis.

34

35 ***Conflict of Interest:*** None of authors have any conflicts of interest to report.

36

37

38 **ABSTRACT**

39 **Objective:** To validate various known risk factors of Parkinsonism and to establish basic  
40 information to formulate public health policy by using a 10-year follow-up cohort model.

41 **Methods:** This population based nation-wide study was performed using the National Health  
42 Insurance Database of reimbursement claims of the Health Insurance Review and Assessment  
43 Service of South Korea data on regular health check-ups in 2003 and 2004, with 10 years'  
44 follow-up.

45 **Results:** We identified 7,746 patients with Parkinsonism. Old age, hypertension, diabetes,  
46 depression, anxiety, taking statin medication, high body mass index, non-smoking, non-  
47 alcohol drinking, and low socioeconomic status were each associated with an increase in the  
48 risk of Parkinsonism (fully adjusted Cox proportional hazards model: hazard ratio (HR) 1.259,  
49 95% confidence interval (CI) 1.194–1.328 for hypertension, HR 1.255, 95% CI 1.186–1.329  
50 for diabetes, HR 1.554, 95% CI 1.664–1.965 for depression, HR 1.808, 95% CI 1.462–1.652  
51 for anxiety, and HR 1.157, 95% CI 1.072–1.250 for taking statin medication).

52 **Conclusions:** In our study, old age, depression, anxiety, and a non-smoker status were found  
53 to be risk factors of Parkinsonism, in agreement with previous studies. However, sex,  
54 hypertension, diabetes, taking statin medication, non-drinking of Alcohol, and lower  
55 socioeconomic status have not been described as risk factors in previous studies and need  
56 further verification in future studies.

57

58 **Key words:** National Health Programs, Parkinsonism, Risk factor, Socioeconomic Status

59

60 Parkinsonism is one of the most common neurodegenerative diseases, affecting > 1% of the  
61 elderly population.<sup>1</sup> With the marked increase in the mean age of the global population, the  
62 prevalence and incidence of Parkinsonism have also increased.<sup>2</sup> The impact of Parkinsonism  
63 on society is a major concern worldwide, including in South Korea. Many genetic risk factors  
64 have been discovered in recent years,<sup>3</sup> but these account for only a minor portion of  
65 Parkinsonism, as the disease etiology involves an interplay of both genetic and environmental  
66 factors. Most of these factors remain unknown; thus, investigating the distribution and  
67 characteristics of the condition is important for identifying further etiologic factors and  
68 planning public health policies.<sup>4</sup>

69 In South Korean, medical care is delivered via the National Health Insurance Service (NHIS)  
70 in which most people are obligated to enroll. All medical health insurance-related data are  
71 collected into a central database. Additionally, South Koreans receive regular health check-  
72 ups with the support of the National Health Insurance Corporation (NHIC) after the age of 40  
73 years. Many studies have investigated the relationship between Parkinsonism and some  
74 probable risk factors.<sup>5-8</sup> These include increasing age,<sup>5</sup> alcohol-use disorder,<sup>6</sup> urbanization  
75 and exposure to pesticides,<sup>9</sup> cardiovascular changes,<sup>7</sup> depression<sup>10</sup>, and anxiety,<sup>11</sup> while  
76 smoking has been proven to a preventative factor against development of Parkinsonism.<sup>12,13</sup>  
77 However, the relationship between socioeconomic status and the onset of Parkinsonism is  
78 unknown.

79 We hypothesized that the relationship of known risk factors and socioeconomic status with  
80 the onset of Parkinsonism could be determined using data from both the regular health check-  
81 up and health insurance databases of South Korea. We therefore sought to validate the role of  
82 various known risk factors for Parkinsonism and to establish a basis for formulating a public  
83 health policy, using an over 10-year follow-up cohort model.

84

85 **METHODS**

86 **Statement of Ethics.** This research project was approved by the NHIS of South Korea  
87 (NHIS-2017-2-542). This study was approved by the Institutional Review Board of our  
88 hospital and adhered to the tenets of the Declaration of Helsinki. The need for obtaining  
89 informed consent was waived. All authors contributed to the study design, results  
90 interpretation, and the decision to submit the manuscript for publication. No commercial  
91 support was obtained for this study.

92

93 **Database.** The management of the NHIS is divided into two independent institutions: the  
94 NHIC and Health Insurance Review and Assessment Service of Korea (HIRA). The NHIC  
95 has accumulated data (National Health Insurance Database; NHID) of the insured person,  
96 premium imposition, and regular health check-up, while HIRA has accumulated data on  
97 health insurance claims, which are accompanied by data regarding diagnostic codes,  
98 procedures, prescribed medication, personal information, information about the hospital, the  
99 direct medical costs of both inpatient and outpatient care, and dental services.<sup>14</sup> Therefore, we  
100 utilized the combined data from the NHIC database of regular health check-ups in 2003 and  
101 2004, and the HIRA database of reimbursement claims from 2003 to 2013.

102 Blue-collar workers can undergo annual health check-ups, while white-collar workers and  
103 self-employed individuals, such as independent businessmen, farmers, fishermen, housewives,  
104 and retirees, can do so every other year. The following are regular health check-up items:

- 105 1. Body index measurements: height, body weight, waist circumference, body mass index  
106 (BMI).
- 107 2. History: smoking, alcohol use, and medication history. Medication history includes the  
108 drugs used for hypertension, diabetes, and hyperlipidemia.

109 3. Screening test: visual, hearing, oral hygiene, and laboratory tests (total cholesterol,  
110 aspartate aminotransferase, alanine aminotransferase, gamma-guanosine triphosphate,  
111 fasting blood glucose, urine protein, plasma creatinine, hemoglobin), and chest X-rays  
112 were performed.

113 After the first health check-up, patients suspected of hypertension or diabetes mellitus (DM)  
114 undergo a second health check-up.

115

116 **Study Sample.** NHIS and HIRA use the Korean Classification of Diseases (KCD) as disease  
117 classification codes; these are modified from the International Classification of Diseases. Of  
118 the 5,147,950 people who underwent regular health check-ups from 2002 to 2003, 10% were  
119 randomly selected (514,795 subjects) for inclusion in this study.

120 Based on HIRA data, we defined patients with Parkinsonism as those who had KCD codes  
121 for Parkinsonism or Parkinson disease (not-otherwise-specified, idiopathic, primary) (G20).  
122 We excluded the codes for secondary Parkinsonism (G21) and Parkinsonism in disease  
123 classified elsewhere (G22).

124

125 **Definition of Risk factors.** We defined the following as risk factors: age, hypertension, DM,  
126 alcohol drinking, smoking, socioeconomic status, statin medication use, depression, and  
127 anxiety. Risk factors were assigned according to the presence of codes in health insurance  
128 claims: hypertension (I10 to I15), DM (E10 to E14), depression (F32, F33), and anxiety (F40  
129 or F41). Statin medication use was defined by drug codes for statins in the health insurance  
130 claims.

131 Based on the Asian standard, BMI was classified into five grades, i.e., < 18.5 as  
132 underweight, 18.5–22.9 kg/m<sup>2</sup> as normal, 22.9–24.9 kg/m<sup>2</sup> as overweight, 25–29.9 kg/m<sup>2</sup> as  
133 moderately obese, and 30–35 kg/m<sup>2</sup> severely obese. Smoking history was classified into non-

134 smokers, ex-smokers, current smokers. Drinking history was divided into the following five  
135 grades: no drinking, drinking 1–2 times a week, 2–3 times a week, 3–4 times a week,  
136 drinking virtually daily.

137

138 **Classification of socioeconomic status by health insurance premium rate.** We assumed  
139 that the health insurance premium rate reflects the socioeconomic status of subjects. The  
140 health insurance premium payment was divided into three types: “self-employed insured,”  
141 “employed insured,” and Medicaid. Medicaid provides medical care for old or disabled  
142 individuals who have little income or property. The population on Medicaid pays a part or  
143 none of their medical bills, although there are regulations and legal limits to the use of the  
144 medical system.

145 The premium rate of employees is set by a standard that is based on their monthly salary,  
146 but as the income of self-employed individuals could not be determined exactly, their  
147 premium rate is set according to conversion points that include the insurance holder’s  
148 property, such the cost of their house, whether they possess a car, economic activity by age  
149 and sex, and total income.

150 The health insurance premium rate is divided into 10 quantiles for each type of premium  
151 payment. We divided socioeconomic status into nine groups according to the premium  
152 payment system (self-employed, employed, Medicaid) and premium rate (four grades) (Table  
153 1).

154

155 **Data processing and statistical analysis.** We created a 10-year follow-up cohort model for  
156 random sampling of 10% of all subjects enrolled in regular health check-ups in 2002 and  
157 2003 (Figure 1). We defined Parkinsonism onset by the presence of a Parkinson’s disease  
158 diagnostic code (G20) for the main or second disease in health insurance claims.

159 Descriptive statistics of the study populations are presented, and chi-square tests were  
160 performed to examine the association of risk factors with Parkinsonism. Adjusted hazard  
161 ratios (HRs) and 95% confidence intervals (CI) were calculated using multivariate Cox  
162 proportional hazard regression. A significance level of 0.05 was selected. SAS for Windows,  
163 version 9.2 (SAS Inc, Cary, NC, USA) was used to perform statistical analyses.

164

## 165 **RESULTS**

166 Table 2 shows the demographic data and the incidence of Parkinsonism in each group  
167 among subjects who underwent regular health check-ups in 2002 and 2003. The HRs of the  
168 subjects aged 50–59, 60–69, 70–79, and 80 years or older were 3.101, 8.958, 14.709, and  
169 16.797, respectively, and statistically significant ( $p < 0.0001$ ). When comparing the sexes, the  
170 HR of females was 0.971, which was statistically insignificant ( $p = 0.3273$ ) (Table 3). In  
171 cases with hypertension, DM, depression, and anxiety, the HRs were 1.259, 1.255, 1.554, and  
172 1.808, respectively, ( $p < 0.0001$ ). The HR of the group taking statins was 1.157, which was  
173 higher than that of the group not taking statins at the time of diagnosis.

174 The risk of Parkinsonism was higher in the highest BMI group than in the normal weight  
175 group ( $p < 0.0001$ ). The HRs of ex-smokers and current smokers were the same (0.920), but  
176 was statistically significant only for current smokers. ( $p < 0.0287$ ). The HRs of all alcohol-  
177 drinking groups were  $< 1$  and were statistically significant ( $p < 0.0001$ ), except for the daily  
178 alcohol-drinking group ( $p = 0.6530$ ). As Medicaid was set as the standard, the HR was  $< 1$  in  
179 all groups ( $p < 0.05$ ), indicating that socioeconomic status and Parkinsonism were closely  
180 related.

181

## 182 **DISCUSSION**

183 The results of our study revealed that increasing age, hypertension, DM, depression, anxiety,



184 extreme overweight, statin medication use, non-smoking, non-alcohol drinking, and the  
185 lowest socioeconomic class were statistically related to the onset of Parkinsonism.

186 Parkinsonism is the second most neurodegenerative disease, and its incidence has been  
187 reported to increase with age in all studies.<sup>4</sup> In our study, there was no difference in the  
188 incidence of Parkinsonism between the sexes, but one review has reported that males have a  
189 1.5- to 2-fold increased risk of developing Parkinsonism than that of females.<sup>4</sup> However,  
190 some large population-based cohort studies on sex and Parkinsonism have been inconsistent.  
191 One study reported that men are more prone to Parkinsonism than women,<sup>5</sup> and another  
192 found the opposite,<sup>15</sup> whereas other studies found no role for sex.<sup>5, 15, 16</sup> Therefore, a meta-  
193 analysis including large population-based cohort studies is necessary to evaluate the  
194 incidence of Parkinsonism according to sex.

195 Hypertension can cause ischemic cerebrovascular lesions that involve dopaminergic or non-  
196 dopaminergic subcortical structures. It also can cause hypertensive vasculopathy in basal  
197 ganglia, which may injure the dopaminergic cells in the pars compacta and cause  
198 Parkinsonism by breaking the neuronal connections between the substantia nigra and  
199 putamen, or by decreasing expression of the  $\beta$ -2,  $\alpha$ -4 subunit of the nicotinic acetylcholine  
200 receptor that activates the dopaminergic pathways.<sup>17</sup> However, most studies related to  
201 hypertension and the Parkinsonism incidence yielded results contrary to our findings<sup>7, 13, 18, 19</sup>  
202 or showed no relationship between hypertension and Parkinsonism development.<sup>20</sup> This is  
203 considered to be related to the pathophysiology and progress of Parkinsonism. Autonomic  
204 nervous system dysfunction is a very common feature in Parkinsonism.<sup>19</sup> Loss of sympathetic  
205 cardiac innervation in Parkinsonism causes changes in cardiovascular physiology, which may  
206 precede Parkinsonism diagnosis.<sup>7, 21, 22</sup> Because the Lewy body pathology involves the dorsal  
207 motor nucleus of the vagus nerve,<sup>23</sup> parasympathetic tone may become dysregulated, leading  
208 to orthostatic hypotension and decreased heart rate variability, which are typical of autonomic

209 dysfunction in Parkinsonism.<sup>24</sup>

210 We found DM to be a risk factor for the development of Parkinsonism. Cross-sectional  
211 studies are limited in their ability to prove causality, and have not yielded concordant results.  
212 In one study, patients with Parkinsonism were more likely to have DM, but another study  
213 showed opposite results.<sup>19, 25</sup> However, one large 18-year prospective cohort study reported  
214 that type 2 DM was a risk factor for Parkinsonism development, consistent with our  
215 findings.<sup>26</sup> Although the relationship between diabetes and Parkinsonism is unclear, animal  
216 and in vitro studies have shown that insulin and brain dopaminergic activity are interrelated.<sup>27</sup>  
217 Thus, insulin dysregulation and the change in insulin action are assumed to affect the  
218 pathophysiology and clinical symptoms of Parkinsonism. However, hypertension and DM  
219 also increase with aging, as does Parkinsonism (excluding childhood type 1 DM and  
220 secondary hypertension in the young). Therefore, we assume that hypertension and DM are  
221 risk factors for development of Parkinsonism.

222 Depression and anxiety are well-known, common, non-motor symptoms of Parkinsonism.<sup>10</sup>  
223 Depression is an early marker of Parkinsonism pathogenesis; significant involvement of  
224 dopaminergic neurons in the substantia nigra<sup>10, 28</sup> and anxiety are early symptoms of  
225 Parkinsonism and are known to involve noradrenergic and serotonergic neurons in the  
226 brainstem.<sup>29</sup> Previous studies have shown that depression and anxiety are significantly  
227 associated with Parkinsonism.<sup>9, 10, 18, 20, 28</sup> However, except for one cohort study,<sup>30</sup> these were  
228 cross-sectional studies,<sup>9, 10, 18, 20, 28</sup> which make it difficult to distinguish between risk factors  
229 for the onset of Parkinsonism and non-motor symptoms of Parkinsonism. Nevertheless, our  
230 study proved that depression and anxiety are risk factors for Parkinsonism.

231 Cholesterol is abundant in the central nervous system and plays an important protective role  
232 against the early development of Parkinsonism. Higher serum cholesterol and serum  
233 triglyceride levels have been reported to reduce the risk of Parkinsonism.<sup>31</sup> Statin is a 3-

234 hydroxy-3-methylglutaryl-coenzyme A reductase inhibitor of cholesterol synthesis.<sup>32</sup> Similar  
235 to our findings, a previous prospective study also demonstrated that statin use significantly  
236 increased the risk of Parkinsonism. However, the findings on statin medication and  
237 development of Parkinsonism have been inconsistent.<sup>33,34</sup> Most of these studies were cross-  
238 sectional and retrospective, making it difficult to identify causal relationships, but a recent  
239 meta-analysis reported that statin medication was associated with a lower risk of developing  
240 Parkinsonism.<sup>35</sup>

241 Obesity is a well-known risk factor for metabolic and vascular disorders, such as type 2 DM,  
242 coronary heart disease, and stroke.<sup>36</sup> Therefore, obesity is suspected as a risk factor for  
243 Parkinsonism; this study showed that severe obesity elevated the risk of Parkinsonism  
244 significantly. The underlying mechanism may involve reduced availability of dopamine D2  
245 receptor in the striatum of obese than non-obese individuals.<sup>11</sup> However, a meta-analysis  
246 reported that higher BMI did not increase Parkinsonism risk;<sup>36</sup> thus the relationship between  
247 obesity and the risk of Parkinsonism remains controversial.<sup>37</sup>

248 Smoking is a powerful risk factor for hypertension, atherosclerosis, and ischemic and  
249 hemorrhagic stroke, but is a well-established preventative factor for Parkinsonism, as also  
250 found in our study. Non-smokers more frequently developed Parkinsonism than ex-smokers  
251 and current smokers.<sup>12, 13, 18, 22, 28, 37</sup> Smoking increases dopamine activity by reducing MAO-  
252 B activity.<sup>12, 28</sup> Cytochrome P-450 family members are responsible for the metabolism and  
253 detoxification of environmental toxins that cause dopaminergic neural damage. Cytochrome  
254 P-450 is induced by smoking, due to the polycyclic hydrocarbons, such as benzopyrene,  
255 present in cigarette smoke.<sup>12, 38</sup>

256 In our study, the risk of Parkinsonism was statistically significantly reduced in all alcohol-  
257 drinking groups, except for the daily alcohol-drinking group, as compared with the non-  
258 alcohol drinking group.<sup>39</sup> One study reported that alcohol drinking was associated with

259 increased risk of Parkinsonism,<sup>37</sup> while the results of other studies were similar to ours.<sup>13, 18</sup>

260 One review article concluded that a weak protective association was more likely to be found  
261 between alcohol drinking and Parkinsonism risk in studies at greater risk of selection and  
262 recall bias. One study found that the risk of Parkinsonism was elevated in patients with  
263 alcohol-abuse disorder,<sup>6</sup> while our study showed that there was no lowered risk of  
264 Parkinsonism in the daily alcohol-drinking group. Therefore, taken together, it is likely that  
265 appropriate alcohol consumption is associated with lowered Parkinsonism risk.

266 One study reported that the incidence of Parkinsonism was not affected by socioeconomic  
267 status.<sup>5</sup> However, we found that the Parkinsonism risk was reduced in all health insurance  
268 payment groups, as compared to the Medicaid group. This is probably because the standards  
269 for determining socioeconomic status differed in the two studies, and Medicaid subscribers in  
270 South Korea are mainly old individuals with no economic capacity.

271 The strengths of our study are that we used a nationwide 10-year follow-up cohort model  
272 with a population > 500,000, and that the data are relatively objective and accurate, based on  
273 regular health check-up data and disease diagnostic codes from HIRA. HIRA reviews claims  
274 with disease codes to determine whether reimbursements are clinically valid. Thus, HIRA can  
275 maintain the quality of health care and provide the standard medical service guidelines for  
276 each disease. There is little chance that medical records were duplicated or omitted, because  
277 all Korean residents receive a unique identification number at birth, which is used in medical  
278 claims. Moreover, the relationship between the onset of Parkinsonism, various comorbidities,  
279 body indexes, and various known risk factors could be verified simultaneously in the present  
280 study. We also assessed socioeconomic status based on health premium payment methods. As  
281 we used a retrospective cohort model, rather than a cross-sectional study, our data are useful  
282 for identification of causality.

283 The study had the following limitations: subjects < 40 years old were excluded, because the

284 subjects reporting for regular health check-up are  $\geq 40$  years In a general multicenter  
285 prospective cohort study, the same diagnostic criteria are used for data collection; however,  
286 since the nationwide data cohort model uses a health insurance-related database, it is very  
287 likely that the same diagnostic criteria were not applied. Smoking, BMI, and premium  
288 payment type are not fixed, but may have changed during the follow-up period. If an  
289 employee becomes unemployed or starts his or her business, the payment system will change  
290 from Employed-insured to Self-insured, and in extreme cases, if the insurance holder has no  
291 earned income or property, the premium payment form may change to Medicaid.

292

### 293 **Conclusion**

294 As previously reported, we found increasing age, depression, anxiety, and non-smoker status  
295 to be risk factors for Parkinsonism. However, sex, hypertension, DM, statin medication use,  
296 alcohol drinking, and lower socioeconomic status were also identified as risk factors, but  
297 have not been reported as such in previous studies, and thus require verification in future  
298 studies. Moreover, the known risk factors of Parkinsonism and socioeconomic status based  
299 on the NHID has not been reported for South Korea previously. By comparing these findings  
300 with the results of studies in other countries, insights into the pathophysiology and  
301 epidemiology of Parkinsonism may be gained, and the results may facilitate formulation of a  
302 Korean public health policy. To verify additional risk factors of Parkinsonism, it is necessary  
303 to perform studies in which NHID data and genetic and environmental factors are combined.

304

305 **References**

- 306 1. Muangpaisan W, Hori H, Brayne C. Systematic review of the prevalence and  
307 incidence of Parkinson's disease in Asia. *J Epidemiol* 2009;19:281-293.
- 308 2. Yamawaki M, Kusumi M, Kowa H, Nakashima K. Changes in prevalence and  
309 incidence of Parkinson's disease in Japan during a quarter of a century. *Neuroepidemiology*  
310 2009;32:263-269.
- 311 3. Polymeropoulos MH, Lavedan C, Leroy E, et al. Mutation in the  $\alpha$ -synuclein gene  
312 identified in families with Parkinson's disease. *Science* 1997;276:2045-2047.
- 313 4. Tan LC. Epidemiology of Parkinson's disease. *Neurology Asia* 2013;18:231-238.
- 314 5. Caslake R, Taylor K, Scott N, Gordon J, Harris C, Wilde K, Murray A, Counsell C.  
315 Age-, gender-, and socioeconomic status-specific incidence of Parkinson's disease and  
316 parkinsonism in northeast Scotland: the PINE study. *Parkinsonism Relat Disord* 2013;19:515-  
317 521.
- 318 6. Eriksson AK, Löfving S, Callaghan RC, Allebeck P. Alcohol use disorders and risk of  
319 Parkinson's disease: findings from a Swedish national cohort study 1972-2008. *BMC Neurol*  
320 2013;13:190.
- 321 7. Jain S, Ton TG, Perera S, et al. Cardiovascular physiology in premotor Parkinson's  
322 disease: a neuroepidemiologic study. *Mov Disord* 2012;27:988-995.
- 323 8. Qiu C, Hu G, Kivipelto M, et al. Association of blood pressure and hypertension with  
324 the risk of Parkinson disease: the National FINRISK Study. *Hypertension* 2011;57:1094-1100.
- 325 9. Dick FD, De Palma G, Ahmadi A, Scott NW, Prescott GJ, Bennett J, Semple S, Dick  
326 S, Counsell C, Mozzoni P, Haites N, Wettinger SB, Mutti A, Otelea M, Seaton A, Söderkvist  
327 P, Felice A; Geoparkinson study group. Environmental risk factors for Parkinson's disease  
328 and parkinsonism: the Geoparkinson study. *Occup Environ Med* 2007;64:666-672.
- 329 10. Fang F, Xu Q, Park Y, et al. Depression and the subsequent risk of Parkinson's

- 330 disease in the NIH-AARP Diet and Health Study. *Mov Disord* 2010;25:1157-1162.
- 331 11. Ishihara-Paul L, Wainwright NW, Khaw KT, et al. Prospective association between  
332 emotional health and clinical evidence of Parkinson's disease. *Eur J Neurol* 2008;15:1148-  
333 1154.
- 334 12. Allam MF, Campbell MJ, Hofman A, Del Castillo AS, Fernández-Crehuet Navajas R.  
335 Smoking and Parkinson's disease: systematic review of prospective studies. *Mov Disord*  
336 2004;19:614-621.
- 337 13. Paganini-Hill A. Risk factors for Parkinson's disease: the leisure world cohort study.  
338 *Neuroepidemiology* 2001;20:118-124.
- 339 14. Lee J, Lee JS, Park S-H, Shin SA, Kim K. Cohort profile: The national health  
340 insurance service–national sample cohort (NHIS-NSC), South Korea. *Int J Epidemiol*  
341 2016;46:e15-e15.
- 342 15. Winter Y, Bezdolnyy Y, Katunina E, et al. Incidence of Parkinson's disease and  
343 atypical parkinsonism: Russian population-based study. *Mov Disord* 2010;25:349-356.
- 344 16. Linder J, Stenlund H, Forsgren L. Incidence of Parkinson's disease and parkinsonism  
345 in northern Sweden: a population-based study. *Mov Disord* 2010;25:341-8.
- 346 17. Tohgi H, Utsugisawa K, Yoshimura M, Nagane Y, Mihara M. Alterations with aging  
347 and ischemia in nicotinic acetylcholine receptor subunits alpha4 and beta2 messenger RNA  
348 expression in postmortem human putamen. Implications for susceptibility to parkinsonism.  
349 *Brain Res* 1998;791:186-90.
- 350 18. Noyce AJ, Bestwick JP, Silveira-Moriyama L, et al. PREDICT-PD: identifying risk  
351 of Parkinson's disease in the community: methods and baseline results. *J Neurol Neurosurg*  
352 *Psychiatry* 2014;85:31-7.
- 353 19. Scigliano G, Musicco M, Soliveri P, Piccolo I, Ronchetti G, Girotti F. Reduced risk  
354 factors for vascular disorders in Parkinson disease patients: a case-control study. *Stroke*

- 355 2006;37:1184-1188.
- 356 20. Huang YF, Cherng YG, Hsu SP, et al. Risk and adverse outcomes of fractures in  
357 patients with Parkinson's disease: two nationwide studies. *Osteoporos Int* 2015;26:1723-1732.
- 358 21. Goldstein DS. Dysautonomia in Parkinson's disease: neurocardiological  
359 abnormalities. *Lancet Neurol* 2003;2:669-676.
- 360 22. Vikdahl M, Bäckman L, Johansson I, Forsgren L, Håglin L. Cardiovascular risk  
361 factors and the risk of Parkinson's disease. *Eur J Clin Nutr* 2015;69:729-733.
- 362 23. Braak H, Ghebremedhin E, Rüb U, Bratzke H, Del Tredici K. Stages in the  
363 development of Parkinson's disease-related pathology. *Cell Tissue Res* 2004;318:121-134.
- 364 24. Valappil RA, Black JE, Broderick MJ, et al. Exploring the electrocardiogram as a  
365 potential tool to screen for premotor Parkinson's disease. *Mov Disord* 2010;25):2296-2303.
- 366 25. Powers KM, Smith-Weller T, Franklin GM, Longstreth W, Swanson PD, Checkoway  
367 H. Diabetes, smoking, and other medical conditions in relation to Parkinson's disease risk.  
368 *Parkinsonism Rel Dis* 2006;12:185-189.
- 369 26. Hu G, Jousilahti P, Bidel S, Antikainen R, Tuomilehto J. Type 2 diabetes and the risk  
370 of Parkinson's disease. *Diabetes Care* 2007;30:842-847.
- 371 27. Craft S, Watson GS. Insulin and neurodegenerative disease: shared and specific  
372 mechanisms. *Lancet Neurol* 2004;3:169-178.
- 373 28. Taylor CA, Saint-Hilaire MH, Cupples LA, et al. Environmental, medical, and family  
374 history risk factors for Parkinson's disease: a New England-based case control study. *Am J*  
375 *Med Genet* 1999;88:742-749.
- 376 29. Lin CH, Lin JW, Liu YC, Chang CH, Wu RM. Risk of Parkinson's disease following  
377 anxiety disorders: a nationwide population-based cohort study. *Eur J Neurol* 2015;22:1280-  
378 1287.
- 379 30. Lin CH, Wu RM, Chang HY, Chiang YT, Lin HH. Preceding pain symptoms and



- 380 Parkinson's disease: a nationwide population-based cohort study. *Eur J Neurol* 2013;20:1398-  
381 1404.
- 382 31. Bykov K, Yoshida K, Weisskopf MG, Gagne JJ. Confounding of the association  
383 between statins and Parkinson disease: systematic review and meta-analysis.  
384 *Pharmacoepidemiol Drug Saf* 2017;26:294-300.
- 385 32. Huang X, Alonso A, Guo X, et al. Statins, plasma cholesterol, and risk of Parkinson's  
386 disease: a prospective study. *Mov Disord* 2015;30:552-559.
- 387 33. Becker C, Meier CR. Statins and the risk of Parkinson disease: an update on the  
388 controversy. *Expert Opin Drug Saf* 2009;8:261-271.
- 389 34. Gao X, Simon KC, Schwarzschild MA, Ascherio A. Prospective study of statin use  
390 and risk of Parkinson disease. *Arch Neurol* 2012;69:380-384.
- 391 35. Bai S, Song Y, Huang X, et al. Statin use and the risk of Parkinson's disease: An  
392 updated meta-analysis. *PLoS One*. 2016;11(3):e0152564.
- 393 36. Wang YL, Wang YT, Li JF, Zhang YZ, Yin HL, Han B. Body mass index and risk of  
394 Parkinson's disease: A dose-response meta-analysis of prospective studies. *PLoS One*.  
395 2015;10:e0131778.
- 396 37. Sääksjärvi K, Knekt P, Männistö S, et al. Reduced risk of Parkinson's disease  
397 associated with lower body mass index and heavy leisure-time physical activity. *Eur J*  
398 *Epidemiol*. 2014;29:285-292.
- 399 38. Allam MF, Del Castillo AS, Navajas RF. Parkinson's disease, smoking and family  
400 history: meta-analysis. *Eur J Neurol* 2003;10:59-62.
- 401 39. Bettiol SS, Rose TC, Hughes CJ, Smith LA. Alcohol consumption and Parkinson's  
402 disease risk: A review of recent findings. *J Parkinsons Dis* 2015;5:425-442.

403

404

405 Table 1. Classification of socioeconomic class by health insurance premium standard (mean  
406 values from 2002 to 2003)

407

| Classification | Income   | Employed Insured | Self-employed Insured |
|----------------|----------|------------------|-----------------------|
|                | Quantile | KRW (US Dollar)  | KRW (US Dollar)       |
| Group 1        | 10       | 843,945 (703.29) | 982,721 (818.93)      |
|                | 9        | 569,525 (474.60) | 590,686 (492.23)      |
| Group 2        | 8        | 384,443 (320.36) | 366,403 (305.34)      |
|                | 7        | 259,505 (216.25) | 227,161 (189.30)      |
|                | 6        | 182,225 (151.85) | 140,893 (117.41)      |
| Group 3        | 5        | 128,145 (106.79) | 93,892 (78.24)        |
|                | 4        | 83,720 (69.77)   | 64,603 (53.84)        |
| Group 4        | 3        | 49,345 (41.12)   | 40,541 (33.78)        |
|                | 2        | 24,625 (20.52)   | 29,120 (247.27)       |
|                | 1        | 9,945 (8.29)     | 8,531 (7.11)          |

408 \*1\$ = 1200 Korean Won Rate

409

410 Table 2. Demographic data and the incidence of Parkinsonism

| Group               | Subjects with<br>Parkinsonism | Subjects without<br>Parkinsonism | Incidence (%) |
|---------------------|-------------------------------|----------------------------------|---------------|
| <b>Age (years)</b>  |                               |                                  |               |
| 40-49               | 648                           | 224,862                          | 0.13          |
| 50-59               | 1,478                         | 144,470                          | 0.29          |
| 60-69               | 3,447                         | 101,583                          | 0.67          |
| 70-79               | 2,088                         | 34,265                           | 0.41          |
| >80                 | 85                            | 1,322                            | 0.02          |
| <b>Total</b>        | <b>7,746</b>                  | <b>506,502</b>                   | <b>1.51</b>   |
| <b>Sex</b>          |                               |                                  |               |
| Men                 | 3,574                         | 275,276                          | 0.69          |
| Women               | 4,172                         | 231,226                          | 0.81          |
| <b>Hypertension</b> |                               |                                  |               |
| Yes                 | 3,917                         | 132,388                          | 0.76          |
| No                  | 3,829                         | 374,114                          | 0.74          |
| <b>Diabetes</b>     |                               |                                  |               |
| Yes                 | 2,096                         | 67,667                           | 0.41          |
| No                  | 5,650                         | 438,835                          | 1.10          |
| <b>Depression</b>   |                               |                                  |               |

---

|                                                               |       |         |      |
|---------------------------------------------------------------|-------|---------|------|
| Yes                                                           | 1,200 | 24,302  | 0.23 |
| No                                                            | 5,258 | 399,874 | 1.24 |
| <b>Anxiety</b>                                                |       |         |      |
| Yes                                                           | 1,863 | 51,437  | 0.36 |
| No                                                            | 5,883 | 455,065 | 1.14 |
| <b>Statin</b>                                                 |       |         |      |
| Yes                                                           | 938   | 32,537  | 0.18 |
| No                                                            | 6,808 | 473,965 | 1.32 |
| <b>BMI</b>                                                    |       |         |      |
| < 18.5                                                        | 181   | 9,659   | 0.04 |
| 18.5–22.9                                                     | 2,108 | 149,450 | 0.50 |
| 23.0-24.9                                                     | 1,681 | 115,366 | 0.40 |
| 25.0-29.9                                                     | 2,007 | 133,134 | 0.47 |
| 30.0-39.9                                                     | 188   | 11,463  | 0.04 |
| <b>Smoking history (number of missing data = 21,740)</b>      |       |         |      |
| Non-Smoker                                                    | 5,691 | 324,584 | 1.16 |
| Ex-smoker                                                     | 532   | 43,134  | 0.11 |
| Current smoker                                                | 1,217 | 117,350 | 0.25 |
| <b>Alcohol use history (numbers of missing data = 21,740)</b> |       |         |      |

---

---

|                               |       |         |      |
|-------------------------------|-------|---------|------|
| No                            | 5,393 | 280,322 | 1.07 |
| 2-3 times/month               | 735   | 76,330  | 0.15 |
| 1-2 times/week                | 703   | 82,950  | 0.14 |
| 3-4 times/week                | 344   | 35,314  | 0.07 |
| Daily                         | 390   | 22,069  | 0.08 |
| <b>Socioeconomic status</b>   |       |         |      |
| Medicaid                      | 39    | 1,006   | 0.01 |
| Self-employed insured grade 1 | 1,136 | 38,514  | 0.22 |
| Self-employed insured grade 2 | 1,004 | 51,036  | 0.20 |
| Self-employed insured grade 3 | 1,009 | 70,598  | 0.20 |
| Self-employed insured grade 4 | 448   | 29,787  | 0.09 |
| Employed-insured Grade 1      | 839   | 75,401  | 0.16 |
| Employed-insured Grade 2      | 767   | 65,357  | 0.15 |
| Employed-insured Grade 3      | 1,649 | 113,355 | 0.32 |
| Employed-insured Grade 4      | 855   | 614,448 | 0.17 |

---

411

412

413 Table 3. Hazard ratios of known risk factors of Parkinsonism

| <b>Variables</b>     | <b>HR</b> | <b>95% Hazard Ratio Confidence Limits</b> | <b>P Value</b> |
|----------------------|-----------|-------------------------------------------|----------------|
| <b>Age</b>           |           |                                           |                |
| 40s                  | 1         |                                           |                |
| 50s                  | 3.101     | 2.808-3.423                               | <.0001         |
| 60s                  | 8.958     | 8.167-9.826                               | <.0001         |
| 70s                  | 14.709    | 13.319-16.244                             | <.0001         |
| 80s                  | 16.797    | 13.112-21.518                             | <.0001         |
| <b>Sex</b>           |           |                                           |                |
| Male                 | 1         |                                           |                |
| Female               | 0.971     | 0.914-1.030                               | 0.3273         |
| <b>Comorbidities</b> |           |                                           |                |
| Hypertension         | 1.259     | 1.194-1.328                               | <.0001         |
| DM                   | 1.255     | 1.186-1.329                               | <.0001         |
| Depression           | 1.808     | 1.664-1.965                               | <.0001         |
| Anxiety              | 1.554     | 1.462-1.652                               | <.0001         |
| Statin               | 1.157     | 1.072-1.250                               | 0.0002         |
| <b>BMI</b>           |           |                                           |                |
| 18.5-22.9            | 0.933     | 0.808-1.078                               | 0.3458         |
| <18.5                | 1.017     | 0.956-1.083                               | 0.5906         |

|                                 |       |             |        |
|---------------------------------|-------|-------------|--------|
| 23.0-24.9                       | 1.005 | 0.946-1.067 | 0.8739 |
| 25.0-29.9                       | 0.932 | 0.806-1.078 | 0.3452 |
| 30.0-39.9                       | 1.878 | 1.746-2.021 | <.0001 |
| <b>Smoking History</b>          |       |             |        |
| Non-Smoker                      | 1     |             |        |
| Ex-smoker                       | 0.920 | 0.831-1.018 | 0.1062 |
| Current Smoker                  | 0.920 | 0.854-0.991 | 0.0287 |
| <b>Alcohol Drinking History</b> |       |             |        |
| Non-Alcohol Drinker             | 1     |             |        |
| Drinking 2-3 times per month    | 0.868 | 0.797-0.946 | 0.0012 |
| Drinking 1-2 times per week     | 0.810 | 0.740-0.887 | <.0001 |
| Drinking 3-4 times per week     | 0.803 | 0.710-0.908 | 0.0005 |
| Drinking- almost everyday       | 0.974 | 0.869-1.092 | 0.6530 |
| <b>Economic status</b>          |       |             |        |
| Medicaid                        | 1     |             |        |
| Self-employed insured grade 1   | 0.571 | 0.414-0.788 | 0.0007 |
| Self-employed insured grade 2   | 0.584 | 0.422-0.807 | 0.0011 |
| Self-employed insured grade 3   | 0.544 | 0.393-0.751 | 0.0002 |
| Self-employed insured grade 4   | 0.502 | 0.359-0.701 | <.0001 |
| Employed-insured Grade 1        | 0.453 | 0.327-0.627 | <.0001 |

---

|                          |       |             |        |
|--------------------------|-------|-------------|--------|
| Employed-insured Grade 2 | 0.518 | 0.374-0.717 | <.0001 |
| Employed-insured Grade 3 | 0.564 | 0.409-0.776 | 0.0004 |
| Employed-insured Grade 4 | 0.553 | 0.400-0.766 | 0.0004 |

---

414

415 **Figure Legend**

416 Figure 1. Flowchart of the study design

417

418



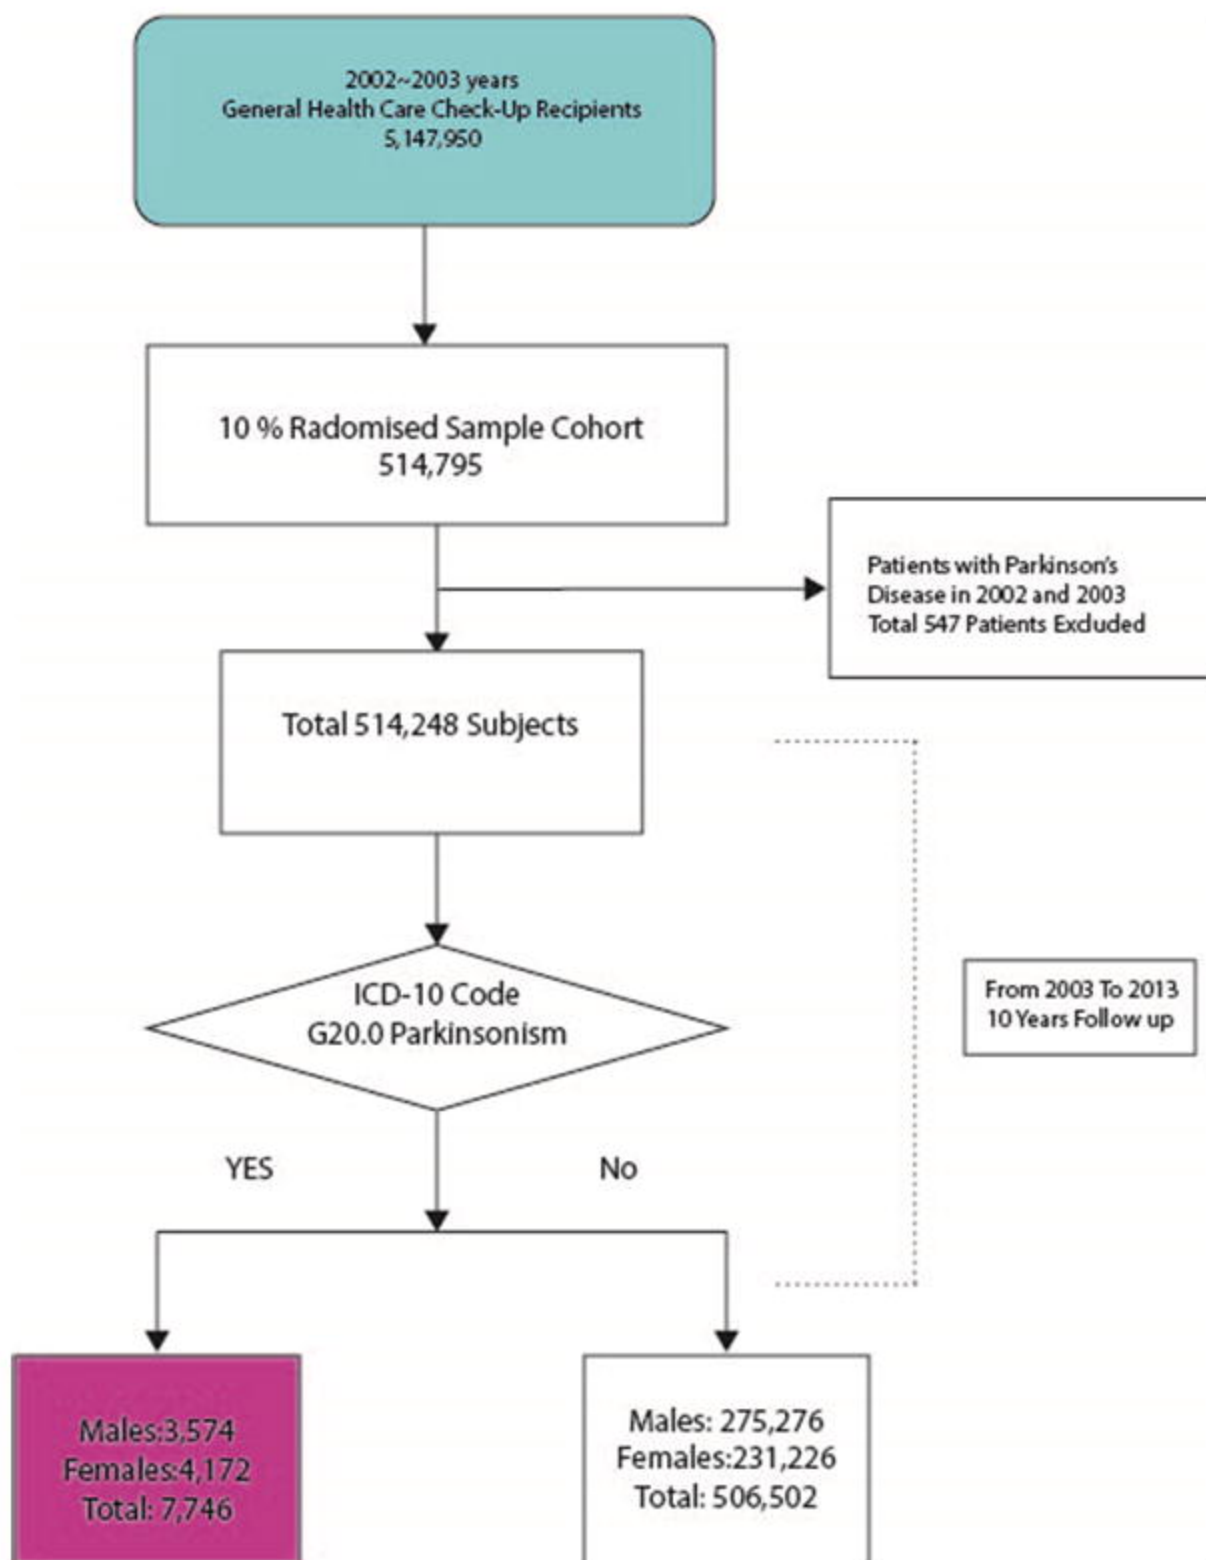

Figure 1
